# Supplementary material for: The Structural Features of Trask That Mediate Its Anti-Adhesive Functions
Source: PLOS journal article supplement (doi:10.1371/journal.pone.0019154), 2011-04-29
Supplement: S1 (10.1371/journal.pone.0019154.s001) [file journal.pone.0019154.s001]

Figure S1

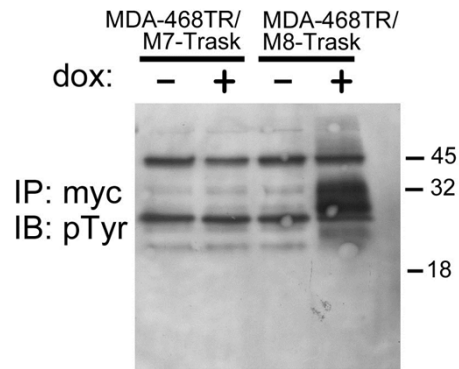

Figure S1: Cell lysates from the indicated transfectant cell types were immunoprecipitated with anti-myc antibodies and immunoblotted with anti-phosphotyrosine antibodies.
