# Supplementary material for: The Structural Features of Trask That Mediate Its Anti-Adhesive Functions
Source: PLOS journal article supplement (doi:10.1371/journal.pone.0019154), 2011-04-29
Supplement: S3 (10.1371/journal.pone.0019154.s003) [file journal.pone.0019154.s003]

Figure S3

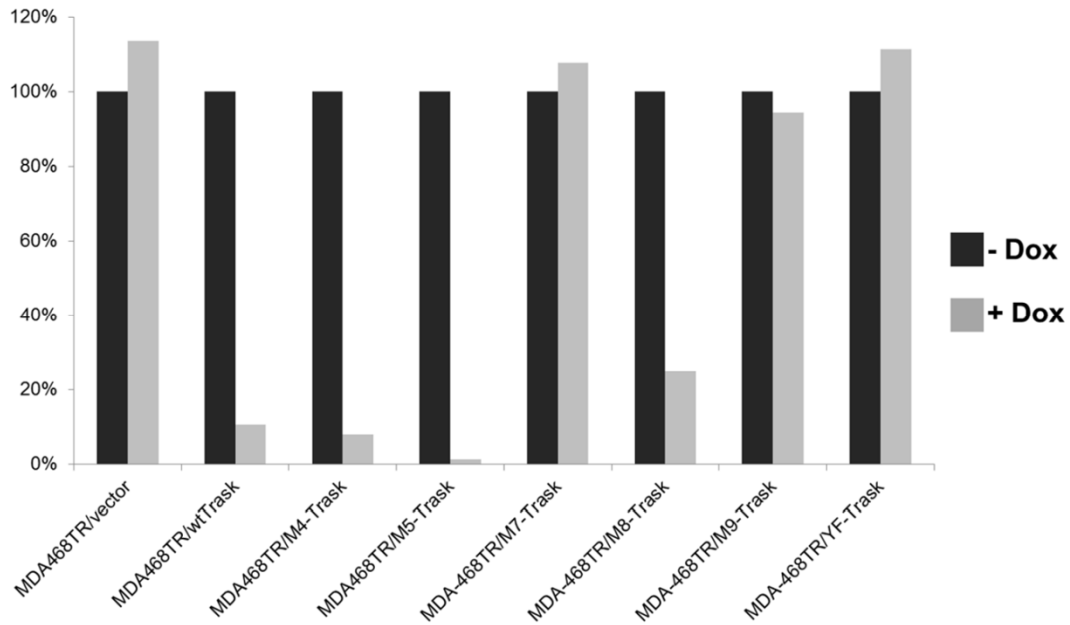

Figure S3: The FAK phosphorylation data of figure 4C was quantified by densitometry using the ImageJ program. The analysis was done separately for each paired data set (+/- doxycycline) corresponding to the different transfected cell types and normalized with respect to the uninduced (-dox) state. The data was not normalized with respect to total FAK expression, as a direct effect of the induction on FAK expression cannot be ruled out.
